# Supplementary material
Source: MDPI journal article supplement (https://www.mdpi.com/2072-4292/15/18/4615)
Supplement: s1 [file s1]

# Using Film-Mulched Drip Irrigation to Improve the Irrigation Water Productivity of Cotton in the Tarim River Basin, Central Asia

Jianyu Zhu <sup>1,2</sup>, Yaning Chen <sup>1,\*</sup>, Zhi Li <sup>1</sup>, Weili Duan <sup>1</sup>, Gonghuan Fang <sup>1</sup>, Chuan Wang <sup>1,2</sup>, Ganchang He <sup>1,2</sup> and Wei Wei <sup>1,2</sup>

<sup>1</sup> State Key Laboratory of Desert and Oasis Ecology, Key Laboratory of Ecological Safety and Sustainable Development in Arid Lands, Xinjiang Institute of Ecology and Geography, Chinese Academy of Sciences, Urumqi 830011, China

<sup>2</sup> University of Chinese Academy of Sciences, Beijing 100049, China

\* Correspondence: chenyn@ms.xjb.ac.cn

Supplementary Table S1 Fifteen global climate models (GCMs) used in the study.

| Number | Model name    | Realizations |
|--------|---------------|--------------|
| 1      | ACCESS-ESM2   | ri1p1f1      |
| 2      | ACCESS-ESM1-5 | ri1p1f1      |
| 3      | CMCC- ESM2    | ri1p1f1      |
| 4      | EC-Earth3     | ri1p1f1      |
| 5      | FGOALS-g3     | ri1p1f1      |
| 6      | GFDL-ESM4     | ri1p1f1      |
| 7      | INM-CM5-0     | ri1p1f1      |
| 8      | IPSL-CM6A-LR  | ri1p1f1      |
| 9      | KACE-1-0-G    | ri1p1f1      |
| 10     | MIROC6        | ri1p1f1      |
| 11     | MPI-ESM1-2-LR | ri1p1f1      |
| 12     | MRI-ESM2-0    | ri1p1f1      |
| 13     | NorESM2-MM    | ri1p1f1      |
| 14     | TaiRSM1       | ri1p1f1      |
| 15     | UKESM1-0-LL   | ri1p1f2      |

Supplementary Table S2 Range of crop parameters used in crop model calibration.

| Parameters                               | Range          |
|------------------------------------------|----------------|
| Plant density (plants ha <sup>-2</sup> ) | 60000 - 150000 |
| CCx (%)                                  | 85% - 100%     |
| Canopy growth coefficient (CGC)          | 0.002 - 0.003  |
| Canopy decline coefficient (CDC)         | 0.006 - 0.008  |
| HI0 (%)                                  | 25% - 40%      |

Supplementary Table S3 Interpolation methods used in the study and its main parameters.

| Interpolation Method            | Interpolation Main Parameter |                               |
|---------------------------------|------------------------------|-------------------------------|
|                                 | Main Parameter               | parameter values              |
| Global Polynomial Interpolation | Power                        | 1                             |
|                                 |                              | 2                             |
|                                 |                              | 3                             |
| Inverse Distance Weighting      | Power                        | 1                             |
|                                 |                              | 2                             |
|                                 |                              | 3                             |
|                                 |                              | 4                             |
| Local Polynomial Interpolation  | Power                        | 5                             |
|                                 |                              | 1                             |
|                                 |                              | 2                             |
| Empirical Bayesian Kriging      | Semivariogram model type     | Power                         |
|                                 |                              | Linear                        |
|                                 |                              | Thin plate spline             |
|                                 |                              | Spherical                     |
|                                 |                              | Circular                      |
| Ordinary kriging                | Semivariogram props          | Exponential                   |
|                                 |                              | Gaussian                      |
|                                 |                              | Linear                        |
| Universal kriging               | Semivariogram props          | Linear drift                  |
|                                 |                              | Quadratic drift               |
|                                 |                              | Thin Plate Spline             |
|                                 |                              | Spline With Tension           |
| Radial Basis Functions          | Radial Basis Functions       | Completely Regularized Spline |
|                                 |                              | Multiquadric Function         |
|                                 |                              | Inverse Multiquadric Function |
|                                 |                              | Regularized Tension           |
| Spline                          | Spline Type                  |                               |

Supplementary Table D4 Seventeen theoretical distributions used in the study.

| theoretical distribution        | The probability density function                                                                                        |
|---------------------------------|-------------------------------------------------------------------------------------------------------------------------|
| Beta                            | $f(x, a, b) = \frac{\Gamma(a+b)x^{a-1}(1-x)^{b-1}}{\Gamma(a)\Gamma(b)}$                                                 |
| Burr Type XII                   | $f(x; c, d) = cd \frac{x^{c-1}}{(1+x^c)^{d+1}}$                                                                         |
| Cauchy                          | $f(x) = \frac{1}{\pi(1+x^2)}$                                                                                           |
| Chi-squared                     | $f(x, k) = \frac{1}{2^{k/2}\Gamma(k/2)} x^{k/2-1} \exp(-x/2)$                                                           |
| Exponential                     | $f(x) = \exp(-x)$                                                                                                       |
| Exponentially modified Gaussian | $f(x, K) = \frac{1}{2K} \exp\left(\frac{1}{2K^2} - x/K\right) \operatorname{erfc}\left(-\frac{x-1/K}{\sqrt{2}}\right)$  |
| f                               | $f(x, df_1, df_2) = \frac{df_2^{df_1/2} df_1^{df_2/2} x^{df_1/2-1}}{(df_2 + df_1 x)^{(df_1+df_2)/2} B(df_1/2, df_2/2)}$ |
| log-logistic                    | $f(x, c) = \frac{cx^{c-1}}{(1+x^c)^2}$                                                                                  |
| Gamma                           | $f(x, a) = \frac{x^{a-1} e^{-x}}{\Gamma(a)}$                                                                            |
| Johnson's SU                    | $f(x, a, b) = \frac{b}{\sqrt{x^2+1}} \phi(a + b \log(x + \sqrt{x^2+1}))$                                                |
| Laplace                         | $f(x) = \frac{1}{2} \exp(- x )$                                                                                         |
| Logistic                        | $f(x) = \frac{\exp(-x)}{(1 + \exp(-x))^2}$                                                                              |
| log-normal                      | $f(x, s) = \frac{1}{sx\sqrt{2\pi}} \exp\left(-\frac{\log^2(x)}{2s^2}\right)$                                            |
| Gaussian                        | $f(x) = \frac{\exp(-x^2/2)}{\sqrt{2\pi}}$                                                                               |
| The Pearson type III            | $f(x, \kappa) = \frac{ \beta }{\Gamma(\alpha)} (\beta(x - \zeta))^{\alpha-1} \exp(-\beta(x - \zeta))$                   |
| Student's t                     | $f(x, \nu) = \frac{\Gamma((\nu+1)/2)}{\sqrt{\pi\nu}\Gamma(\nu/2)} (1+x^2/\nu)^{-(\nu+1)/2}$                             |
| continuous uniform              | $f(x) = \frac{1}{b-a}, a < x < b$                                                                                       |

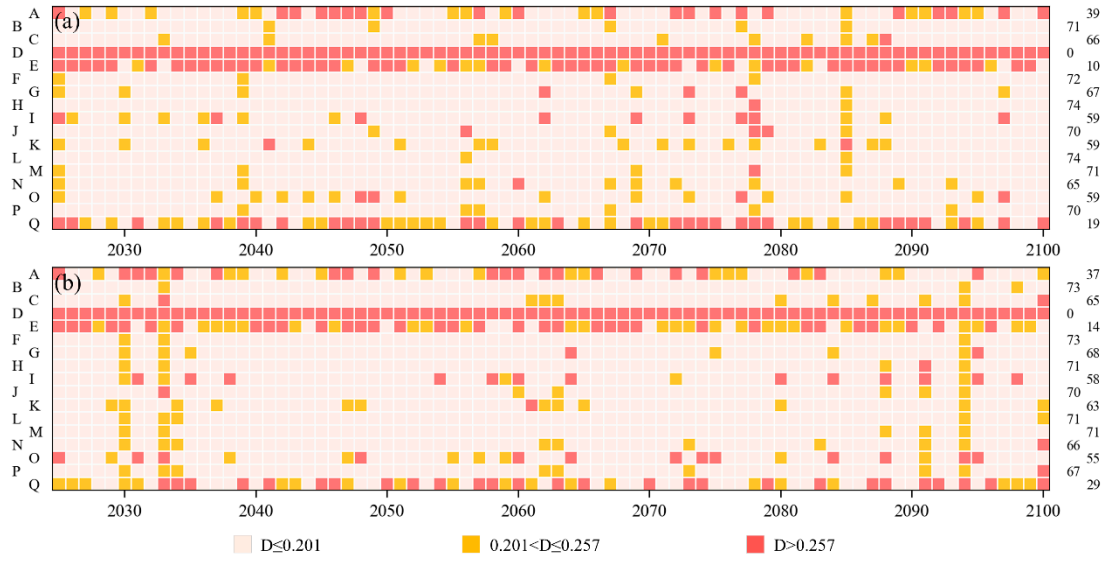

Supplementary Fig. S1. Results of the Kolmogorov-Smirnov test for yield multi-model ensembles under different climate scenarios. (a) SSP245. (b) SSP585. The letters A-Q on the left indicate beta distribution, Burr Type XII distribution, Cauchy distribution, Chi-squared distribution, exponential distribution, exponentially modified Gaussian distribution, f distribution, log-logistic distribution, gamma distribution, su-Johnson's SU distribution, Laplace distribution, logistic distribution, log-normal distribution, Gaussian distribution, Pearson type III distribution, Student's t distribution, and uniform distribution, respectively. The numbers on the right indicate the number of years that met the  $\alpha = 0.1$  condition for each distribution when tested.  $D \leq 0.201$  and  $0.201 < D \leq 0.257$  denote that the significance level of  $\alpha = 0.1$  and  $\alpha = 0.01$ , respectively, was met, while  $D > 0.257$  indicates that the significance level of  $\alpha = 0.01$  was not met. Each test includes the area-weighted average of all pixels in the same year of the 15 models.

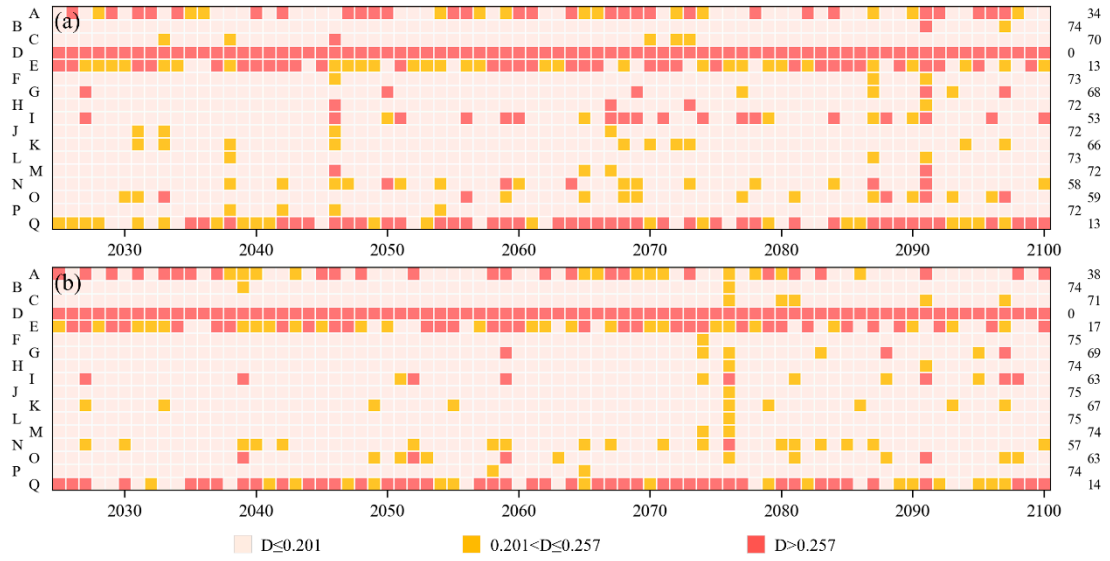

Supplementary Fig. S2. Results of the Kolmogorov-Smirnov test for irrigation water productivity multi-model ensembles under different climate scenarios. (a) SSP245. (b) SSP585. The letters A-Q on the left indicate beta distribution, Burr Type XII distribution, Cauchy distribution, Chi-squared distribution, exponential distribution, exponentially modified Gaussian distribution, f distribution, log-logistic distribution, gamma distribution, su-Johnson's SU distribution, Laplace distribution, logistic distribution, log-normal distribution, Gaussian distribution, Pearson type III distribution, Student's t distribution, and uniform distribution, respectively. The numbers on the right indicate the number of years that met the  $\alpha = 0.1$  condition for each distribution when tested.  $D \leq 0.201$  and  $0.201 < D \leq 0.257$  indicate that the significance level of  $\alpha = 0.1$  and  $\alpha = 0.01$ , respectively, was met, while  $D > 0.257$  indicates that the significance level of  $\alpha = 0.01$  was not met. Each test includes the area-weighted average of all pixels in the same year of the 15 models.

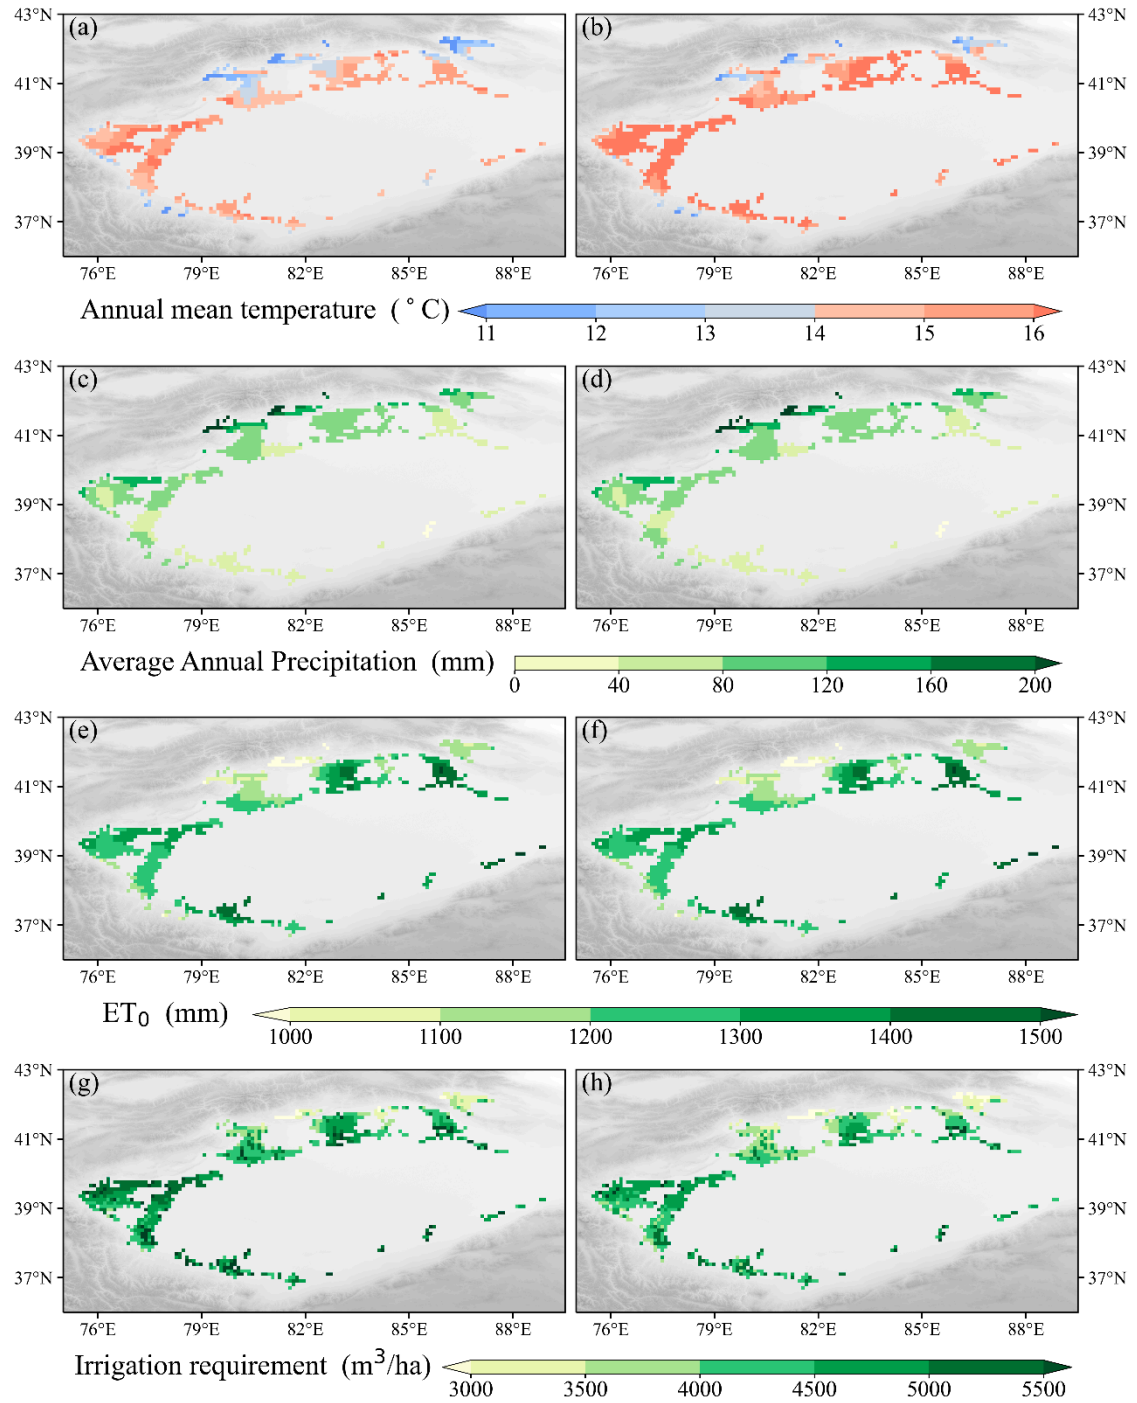

Supplementary Fig. S3. Annual average temperature, annual precipitation, annual reference evapotranspiration, and annual irrigation requirement under flood irrigation conditions in the Tarim River Basin (2025-2100) for different climate change scenarios. (a), (c), (e), and (g) represent the SSP245 scenario, while (b), (d), (f), and (h) represent the SSP585 scenario. (a) and (b) show the annual average temperature, (c) and (d) show the annual precipitation, (e) and (f) show the annual reference evapotranspiration, and (g) and (h) show the annual irrigation requirement under flood irrigation conditions.

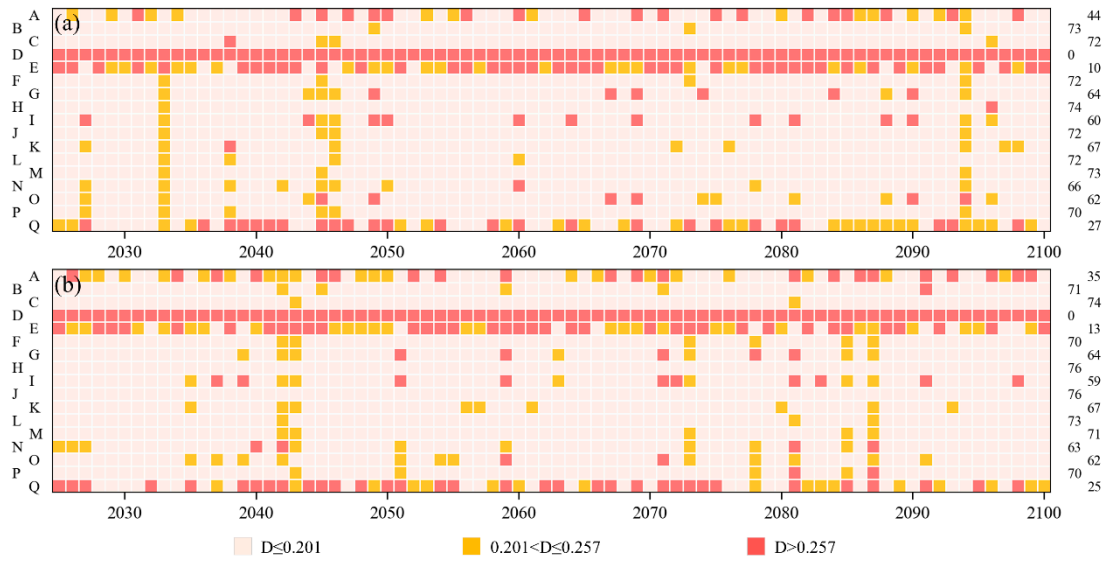

Supplementary Fig. S4. Results of the Kolmogorov-Smirnov test for irrigation water productivity multi-model ensembles under different climate scenarios for film-mulched drip irrigation. (a) SSP245. (b) SSP585. The letters A-Q on the left indicate beta distribution, Burr Type XII distribution, Cauchy distribution, Chi-squared distribution, exponential distribution, exponentially modified Gaussian distribution, f distribution, log-logistic distribution, gamma distribution, su-Johnson's SU distribution, Laplace distribution, logistic distribution, log-normal distribution, Gaussian distribution, Pearson type III distribution, Student's t distribution, and uniform distribution, respectively. The numbers on the right indicate the number of years that met the  $\alpha = 0.1$  condition for each distribution when tested.  $D \leq 0.201$  and  $0.201 < D \leq 0.257$  indicate that the significance level of  $\alpha = 0.1$  and  $\alpha = 0.01$ , respectively, was met, while  $D > 0.257$  indicates that the significance level of  $\alpha = 0.01$  was not met. Each test includes the area-weighted average of all pixels in the same year of the 15 models.

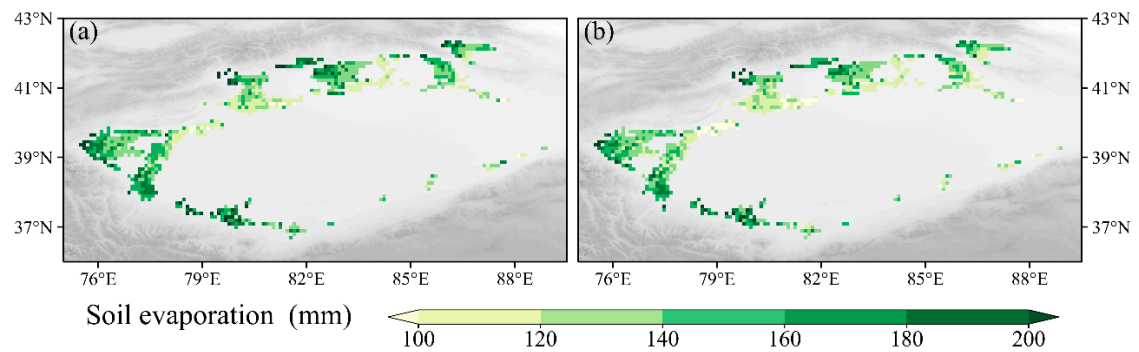

Supplementary Fig. S5. Spatial distribution of soil evaporation for different climate scenarios under flood irrigation. (a) SSP245. (b) SSP585.
